# Supplementary material
Source: PubMed Central journal article supplement (PMC7990393)
Supplement: NIHMS1627451-supplement-1.pdf [file NIHMS1627451-supplement-1.pdf]

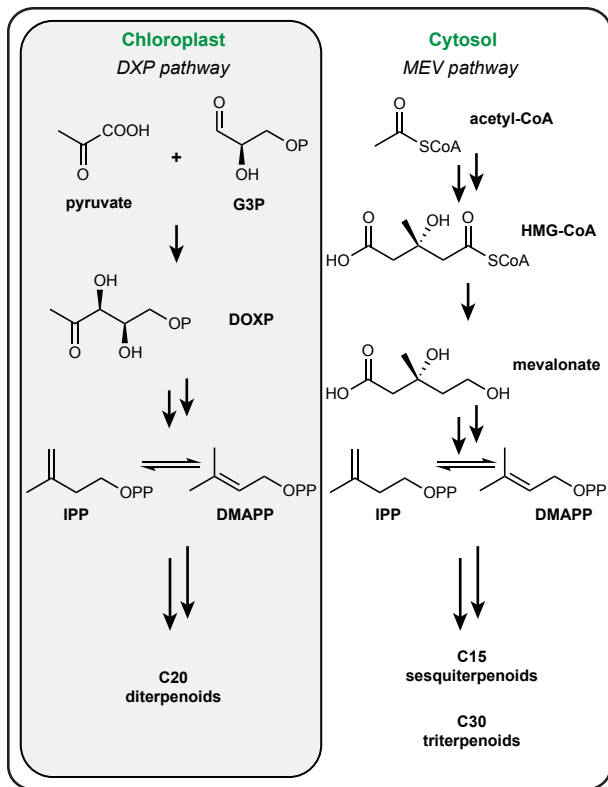

**Supplementary Figure 1. Terpenoid biosynthesis in a plant cell can proceed via the chloroplast localized DXP pathway and the cytosol localized MEV pathway.** G3P, glyceraldehyde 3-phosphate; DOXP, 1-deoxy-D-xylulose-5-phosphate synthase; IPP, isopentyl pyrophosphate; DMAPP, dimethylallyl pyrophosphate; HMG-CoA, 3-hydroxy-3-methylglutaryl-CoA.

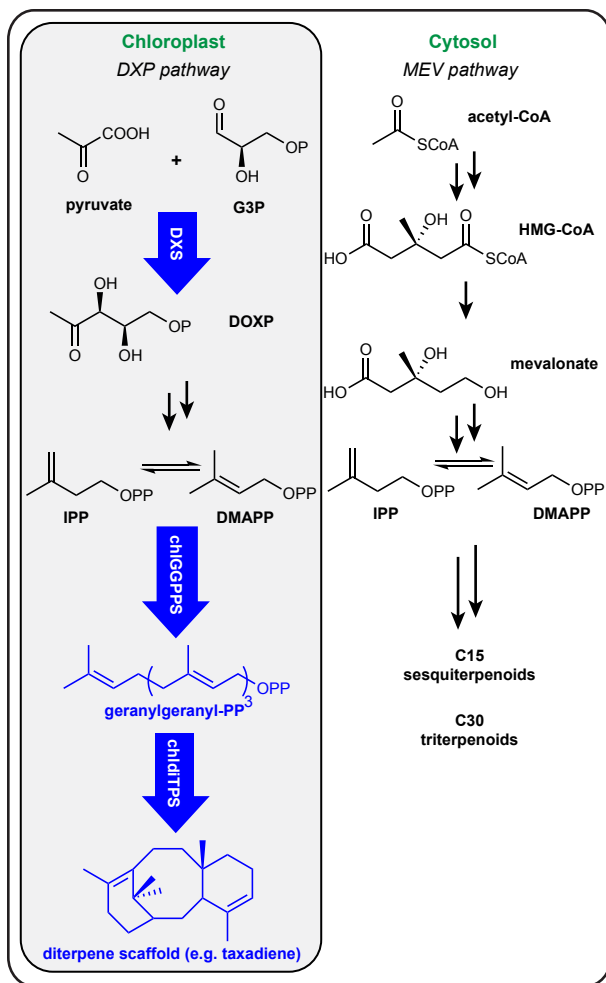

**Supplementary Figure 2. Yield improvement of diterpenoids through the chloroplastic, DXP pathway requires overexpression of rate limiting gene DXS.** Arrows in blue represent chloroplast localized and overexpressed genes.. G3P, glyceraldehyde 3-phosphate; DXS, 1-deoxy-D-xylulose-5-phosphate synthase; DOXP, 1-deoxy-D-xylulose-5-phosphate synthase; IPP, isopentyl pyrophosphate; DMAPP, dimethylallyl pyrophosphate; chIGGPPS, chloroplastic geranylgeranyl pyrophosphate synthase; chdiTPS, chloroplastic diterpene synthase(s); HMG-CoA, 3-hydroxy-3-methylglutaryl-CoA;

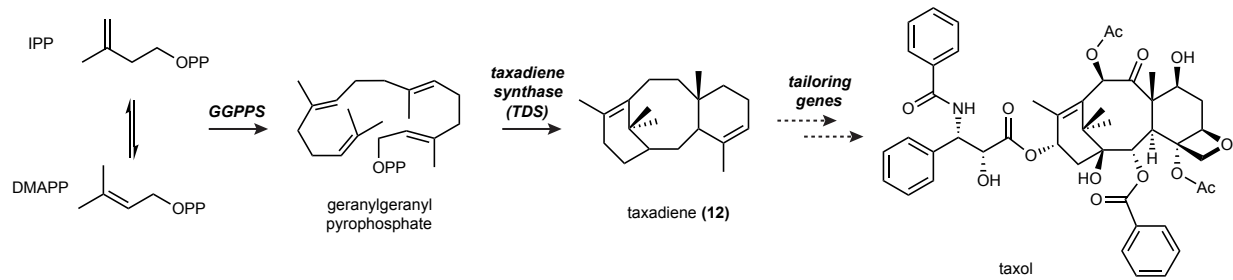

**Supplementary Figure 3. Simplified taxol biosynthetic pathway**

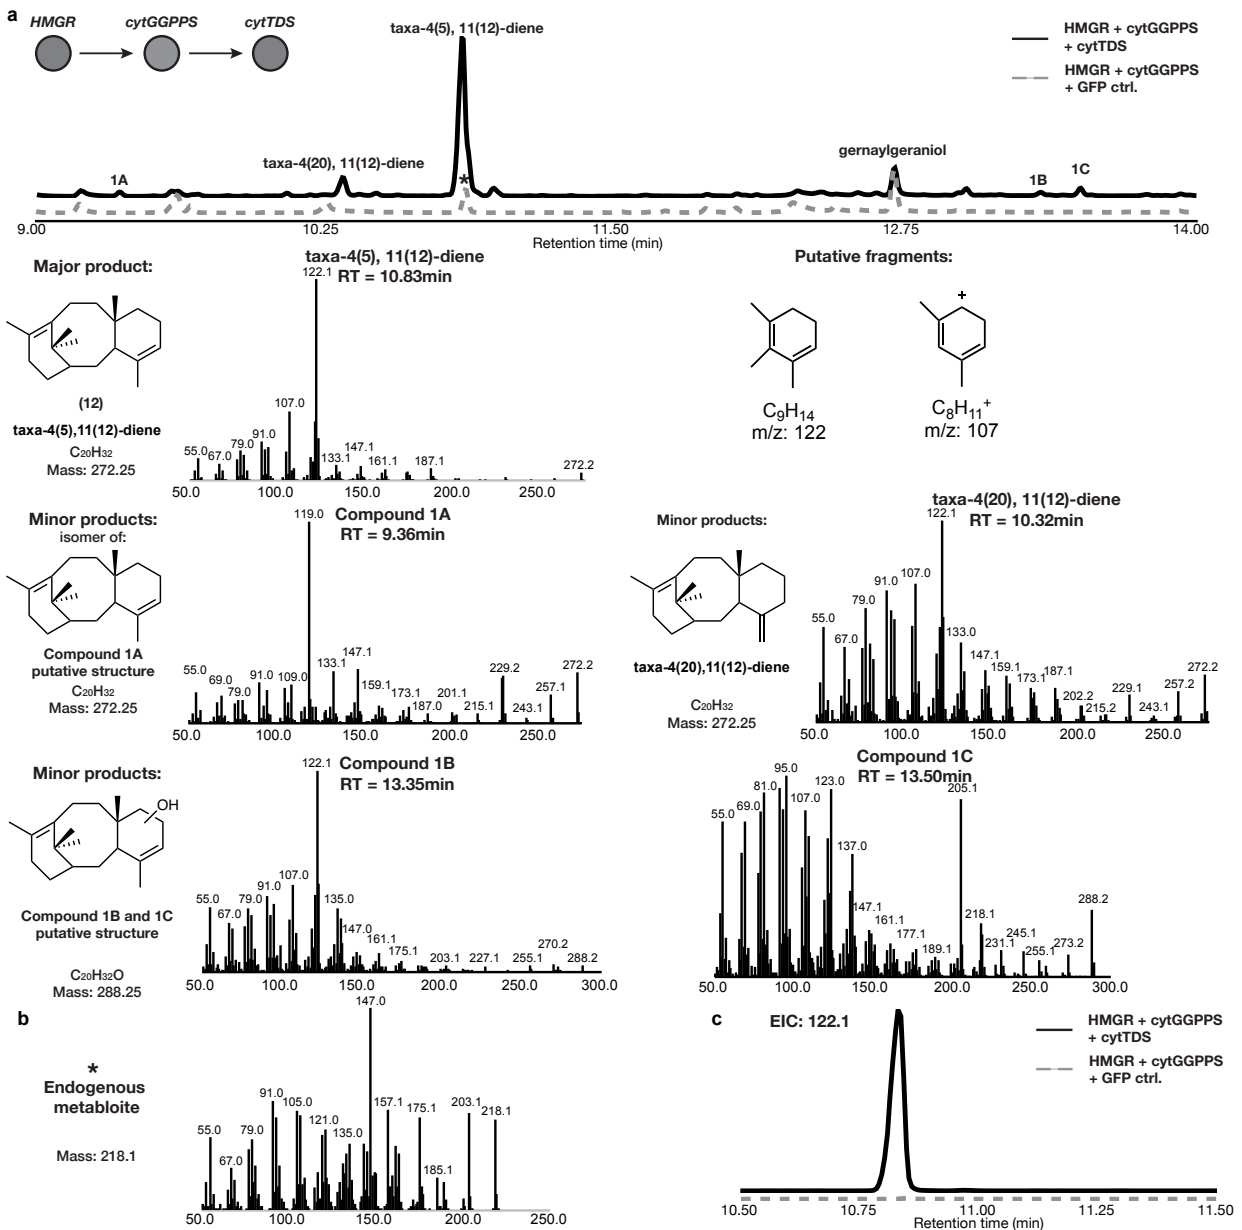

**Supplementary Figure 4: Characterization of intermediates from overexpression of *cytTDS* via MEV engineering. (a)** GC-MS total ion chromatogram (TIC) and MS spectra of products from overexpression of *HMGR*, *cytGGPPS* and *cytTDS* in *N. benthamiana*. Representative TICs are shown. Five products with m/z corresponding to diterpene derived scaffolds were observed upon expression of *cytTDS*. Identified products corresponded to **12**, isomer, taxadiene-4(20), 11(12)-diene, and three minor taxadiene-derived scaffolds<sup>57</sup>. Putative ion structures for **12** were assigned as reference. Putative structures are preliminary and based on predicted formulas combined with analysis of fragment ions observed in MS spectra. An endogenous metabolite co-eluting with taxadiene was identified (\* in the TIC). **(b)** MS spectra of endogenous metabolite. **(c)** GC-MS extracted ion chromatogram (EIC) using m/z = 122.1, corresponding an abundant fragment found in the MS of **12**, confirmed that **12** is only present upon *TDS* expression.

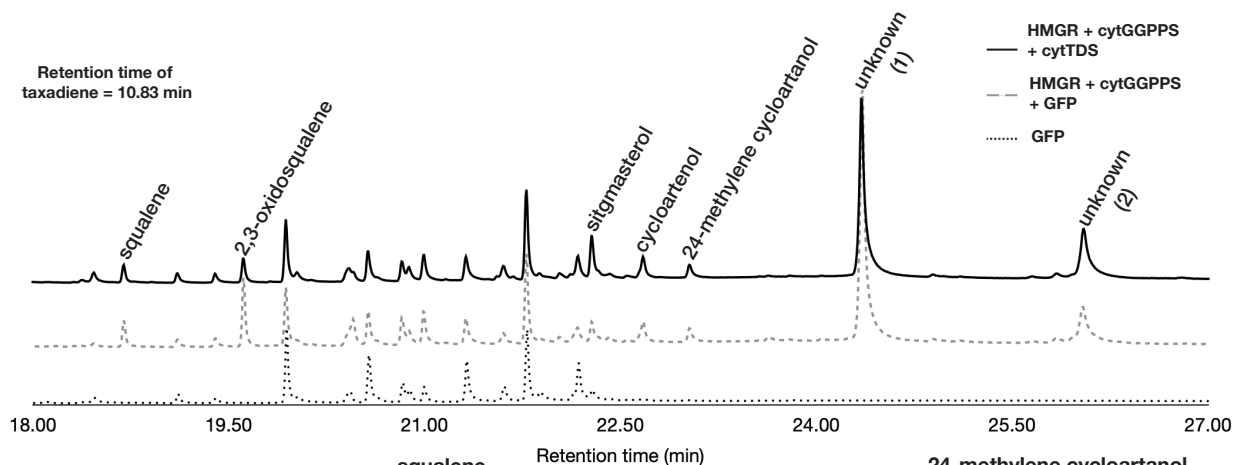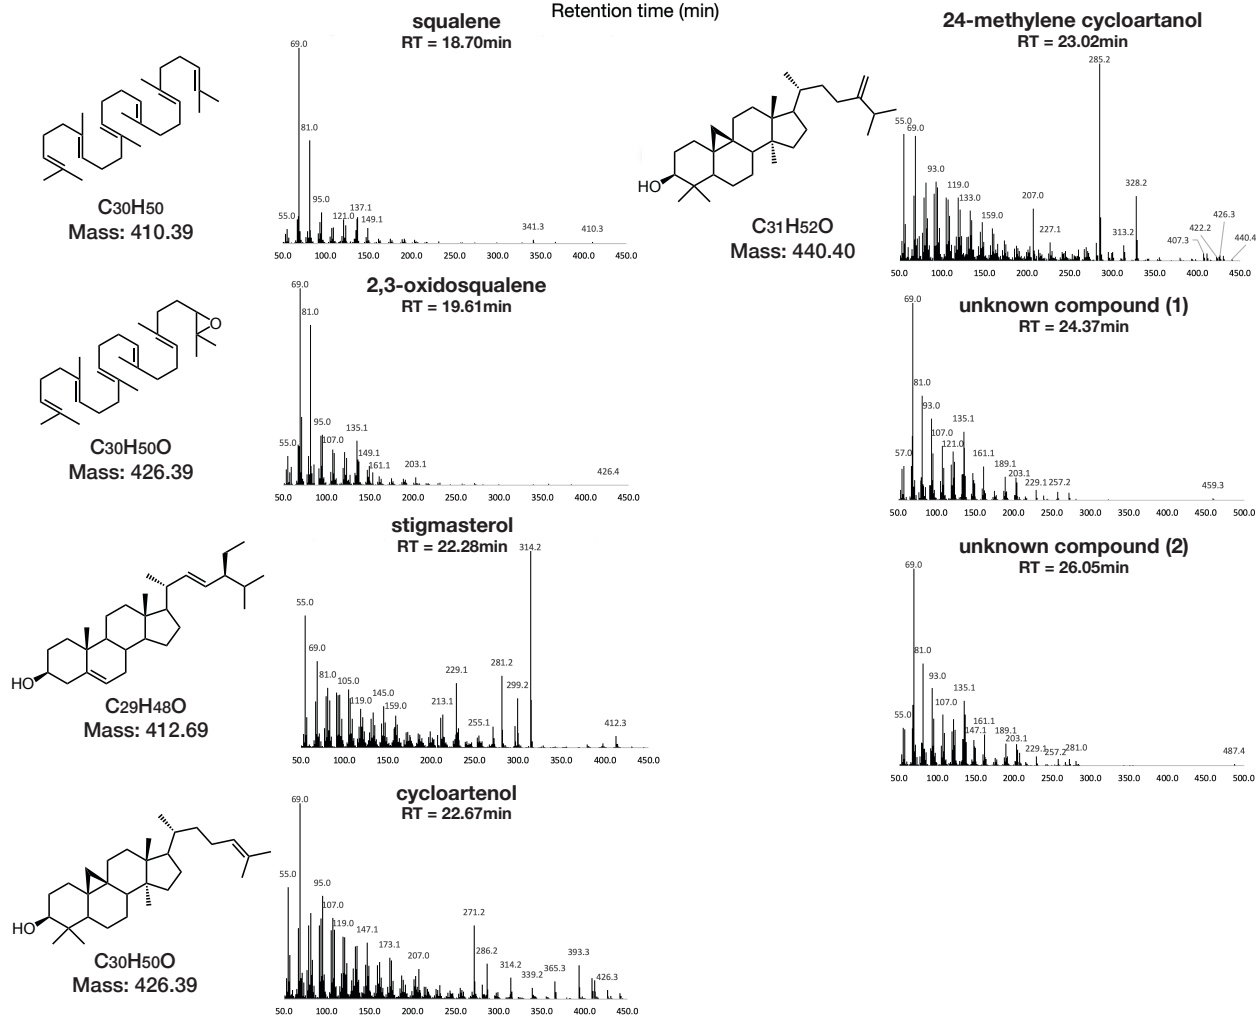

**Supplementary Figure 5: Overexpression of *cytGGPPS* and *HMGR* alters endogenous triterpenoid metabolism.** GC-MS total ion chromatogram (TIC) and MS spectra of triterpenoid derived products observed in *N. benthamiana*. Overexpression of *cytGGPPS* and *HMGR* results in the accumulation of endogenous phytosterols in leaf extracts independent of co-expression with *cytTDS*. Assignments for labeled peaks was done via comparison against MS spectra from previous reports<sup>58</sup>.

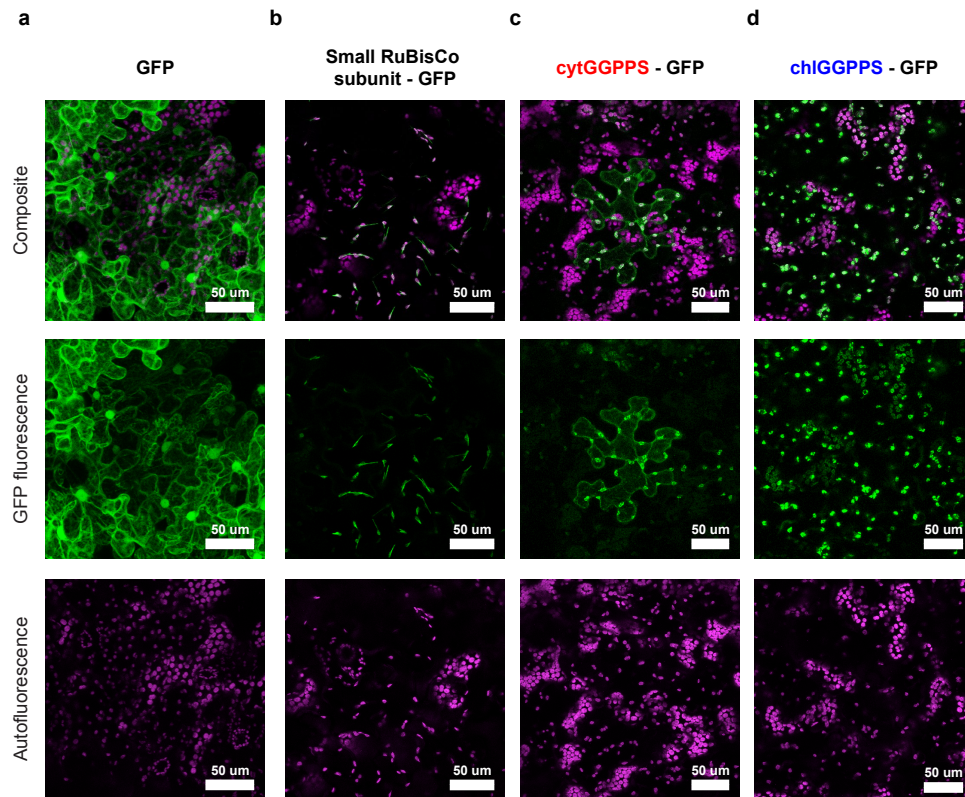

**Supplementary Figure 6: Subcellular localization of overexpressed cytGGPPS-GFP and chlGGPPS-GFP fusion proteins and controls in *N. benthamiana*.** (a) GFP localization and a (b) GFP fusion construct of the small subunit of RuBisCo indicate respective cytosolic and plastid localization. (c) Partial cytosolic localization of cytGGPPS-GFP was observed via the truncation of the predicted chloroplast transit peptide of GGPPS. (d) chlGGPPS-GFP overexpression resulted in plastid localization. Images of subcellular localization were chosen. All images show z-stacks of maximum intensity projections scaled to the same intensity range for GFP fluorescence (green; 488nm excitation, 500 - 550 emission), chlorophyll autofluorescence (magenta; 488nm excitation, 650nm excitation, 650 - 700 emission) and the two channel composite. Images are representative of three biological replicates repeated over two independent experiments.

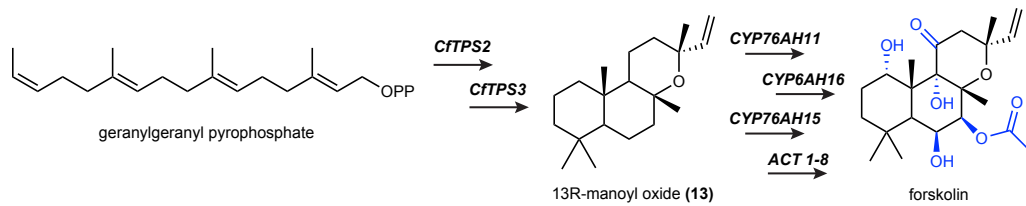

**Supplementary Figure 7: Previously established forskolin biosynthetic pathway.**

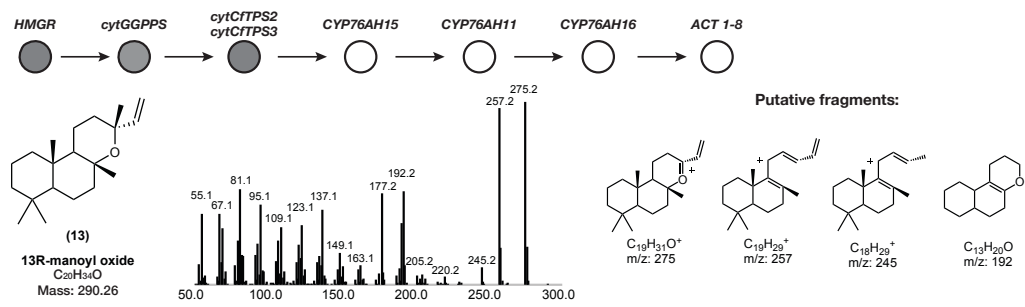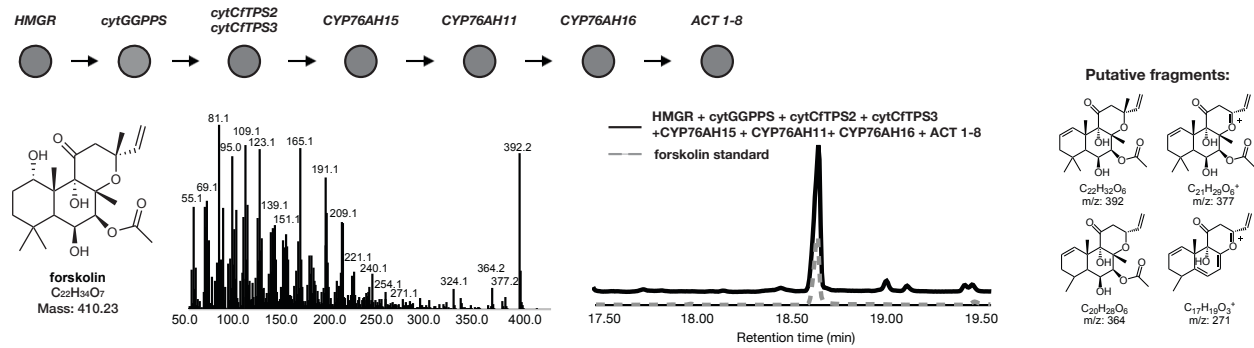

**Supplementary Figure 8: MS spectra of 13R-manoyl oxide and forskolin.** Putative ion structures for both products were assigned as reference.



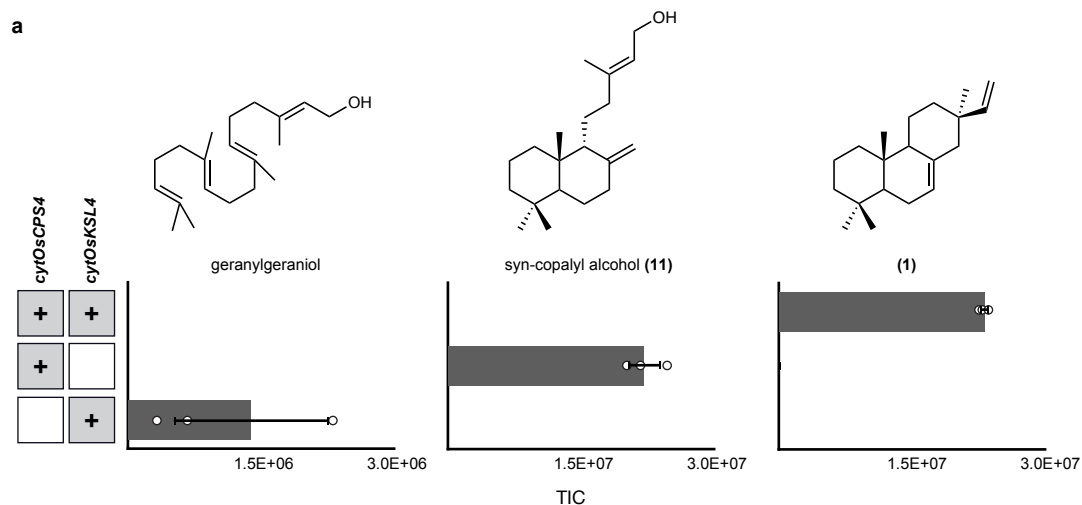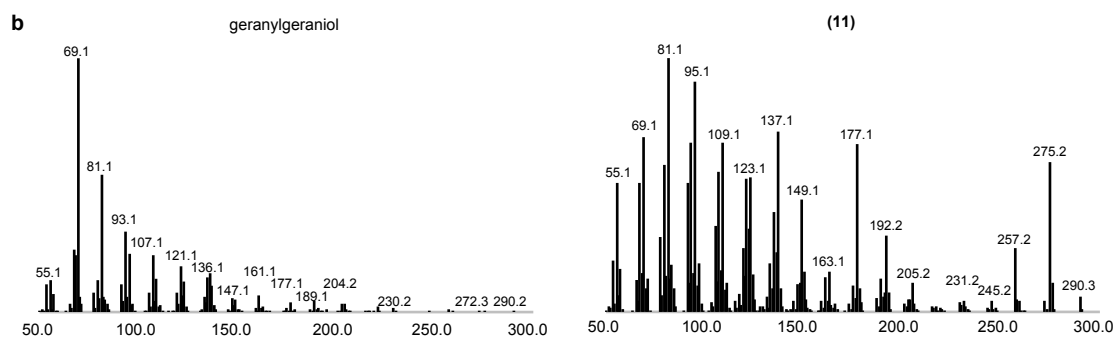

**Supplementary Figure 9: Characterization and yields of pathway intermediates upon overexpression of either *cytoCPS4* or *cytoKSL4* via cytosolic engineering. (a) Average GC-MS ion abundances of syn-pimaradiene precursors after overexpression of indicated genes via cytosolic engineering. Values and error bars represent the mean and the standard deviation of biological triplicates. (b) MS spectra of geranylgeraniol and **11**.**

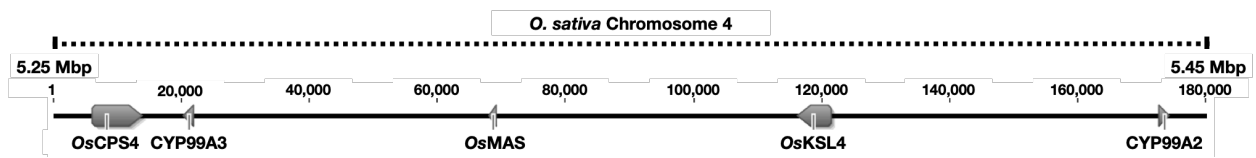

**Supplementary Figure 10: Depiction of momilactone gene cluster on *Oryza sativa* chromosome 4.** *OsCPS4*, *OsKSL4*, *CYP99A3* and *OsMAS* have previously been directly implicated in momilactone biosynthesis.

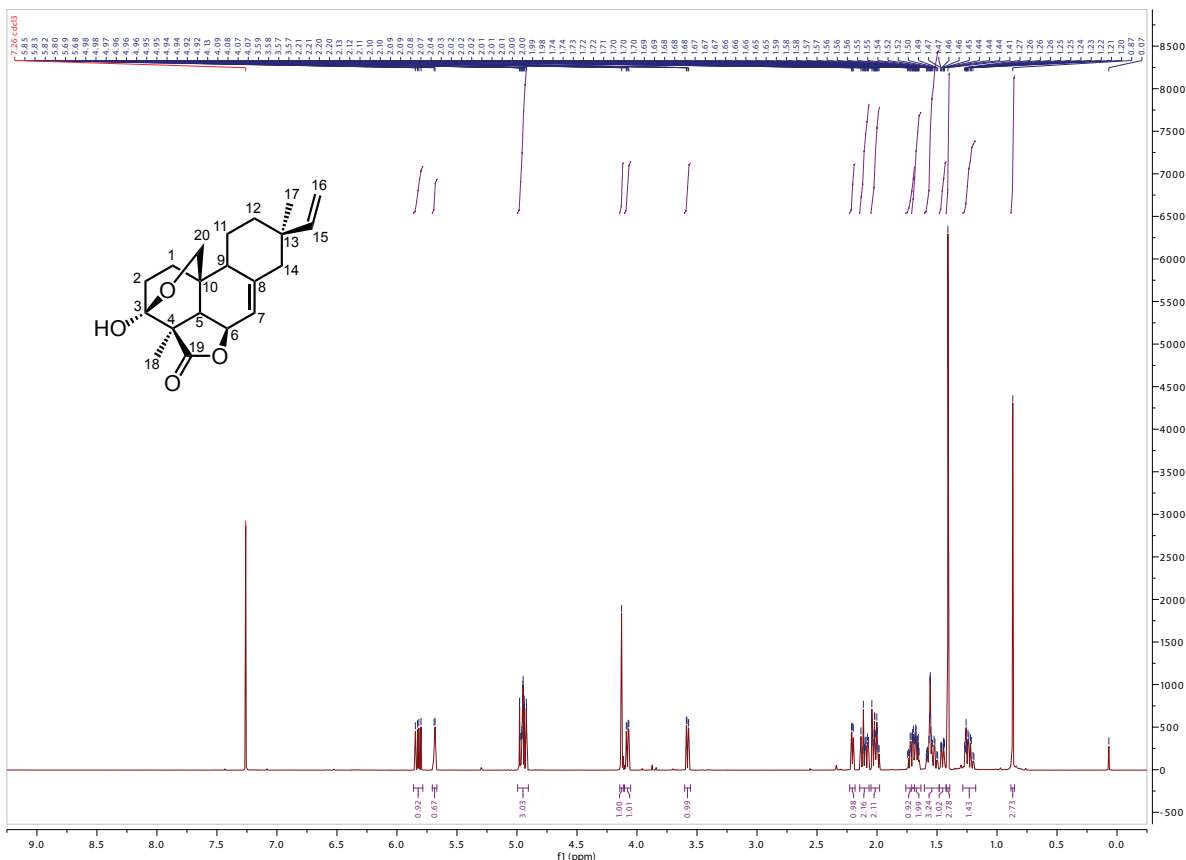

| Proton            | <sup>1</sup> H assignments (this study) |              |               | <sup>1</sup> H assignments <sup>10</sup> |              |               |
|-------------------|-----------------------------------------|--------------|---------------|------------------------------------------|--------------|---------------|
|                   | Shift (ppm)                             | Multiplicity | Coupling (Hz) | Shift (ppm)                              | Multiplicity | Coupling (Hz) |
| 3-OH              | 4.13                                    | bS           |               |                                          | Not reported |               |
| 5-H               | 2.2                                     | dd           | 6.8 and 2.1   | 2.2                                      | dd           | 7.1 and 2.1   |
| 6-H               | 4.96                                    | bd           | 4.3           | 4.94                                     | dd           | 7.1 and 4.5   |
| 7-H               | 5.69                                    | d            | 4.9           | 5.68                                     | d            | 4.5           |
| 9-H               | 1.76 - 1.69                             | m            |               |                                          | Not reported |               |
| 15-H              | 5.82                                    | dd           | 17.4 and 10.8 | 5.83                                     | dd           | 17.6 and 10.5 |
| 16-H <sub>A</sub> | 4.93                                    | dd           | 10.7 and 1.0  | 4.92                                     | dd           | 10.5 and 1.2  |
| 16-H <sub>B</sub> | 4.96                                    | dd           | 17.4 and 1.0  | 4.95                                     | dd           | 17.6 and 1.2  |
| 17-H <sub>3</sub> | 0.87                                    | S            |               | 0.87                                     | S            |               |
| 18-H <sub>3</sub> | 1.41                                    | S            |               | 1.4                                      | S            |               |
| 20-H <sub>A</sub> | 3.58                                    | dd           | 9.2 and 2.1   | 3.55                                     | dd           | 9.0 and 2.1   |
| 20-H <sub>B</sub> | 4.08                                    | dd           | 9.2 and 3.4   | 4.07                                     | bd           | 9.0           |

<sup>1</sup>H NMR (600 MHz, Chloroform-*d*)  $\delta$  5.82 (dd,  $J = 17.4, 10.8$  Hz, 1H), 5.69 (d,  $J = 4.9$  Hz, 1H), 4.96 (dd,  $J = 17.4, 1.0$  Hz, 1H), 4.96 (bd, 1H), 4.93 (dd,  $J = 10.7, 1.0$  Hz, 1H), 4.13 (bs, 1H), 4.08 (dd,  $J = 9.2, 3.4$  Hz, 1H), 3.58 (dd,  $J = 9.2, 2.1$  Hz, 1H), 2.20 (dd,  $J = 6.8, 2.1$  Hz, 1H), 2.14 – 2.07 (m, 2H), 2.05 – 1.98 (m, 2H), 1.76 – 1.69 (m, 1H), 1.71 – 1.63 (m, 2H), 1.60 – 1.48 (m, 2H), 1.48 – 1.42 (m, 1H), 1.41 (s, 3H), 1.28 – 1.18 (m, 1H), 0.87 (s, 3H).

**Supplementary Figure 11:** <sup>1</sup>H NMR spectra of momilactone B in CDCl<sub>3</sub> isolated from *N. benthamiana*.

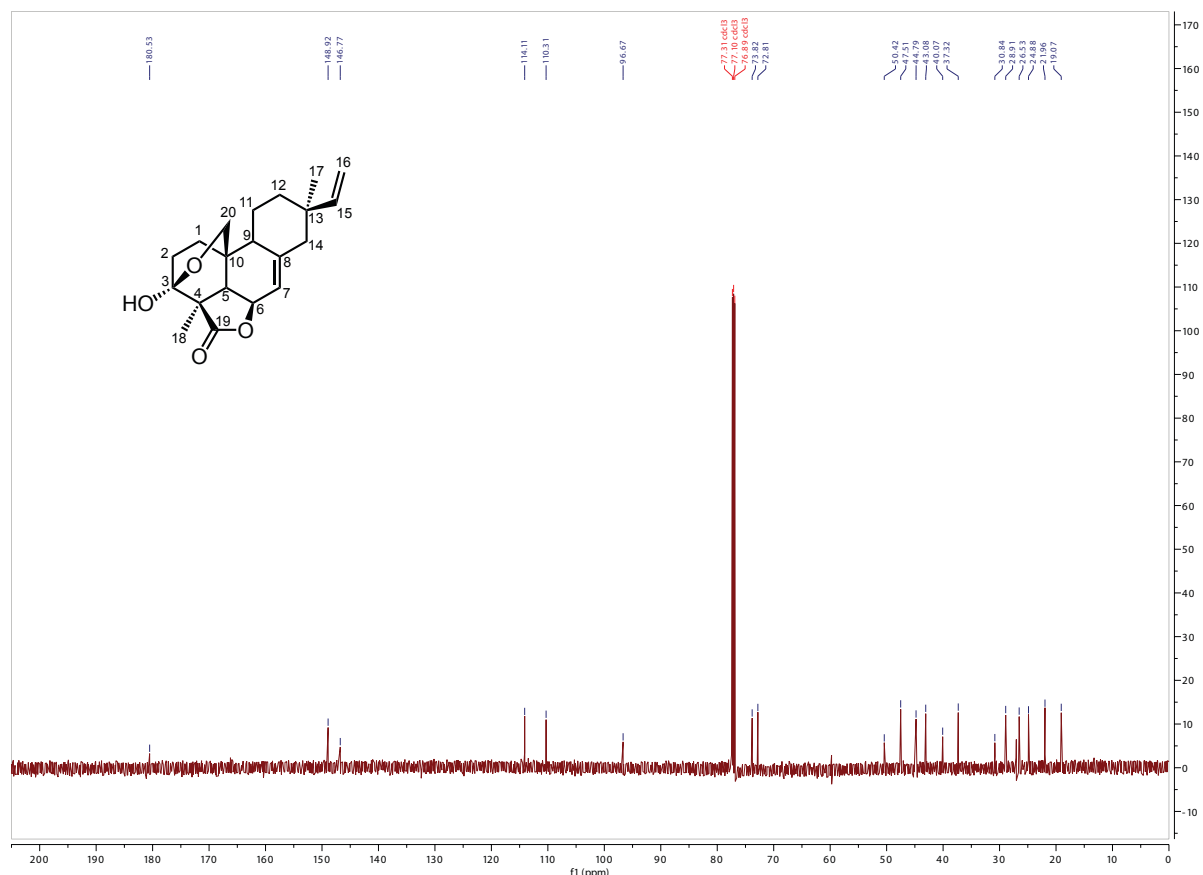

**Supplementary Figure 12:**  $^{13}\text{C}$  NMR spectra of momilactone B in  $\text{CDCl}_3$  isolated from *N. benthamiana*.

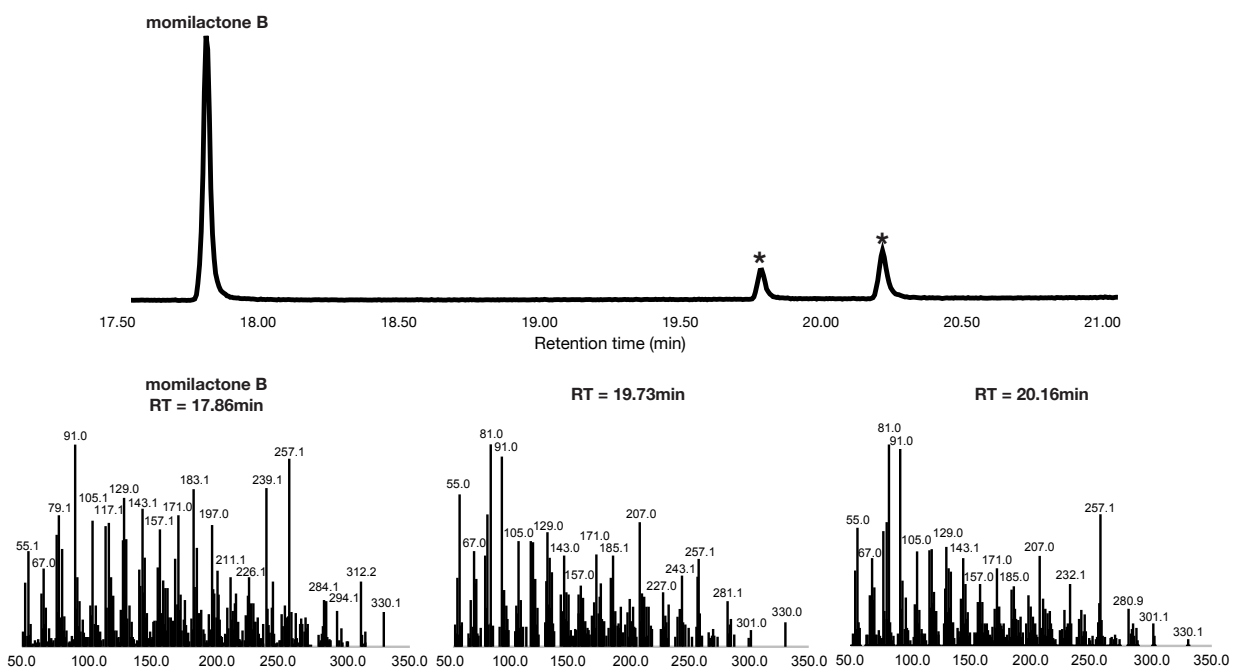

**Supplementary Figure 13:** TIC from purified momilactone B from large scale isolation in *N. benthamiana*. Two impurities were not separable by silica-gel chromatography. Based on MS fragmentation patterns, these impurities possibly correspond to structural isomers of momilactone B or the ring-opened form of the lactol.

**Supplementary Table 1:** List of potential momilactone biosynthetic gene candidates.

|           | Name                  | Family              | Gene ID      | Chromosome | Rank                   |                         |                       |                         |                        |
|-----------|-----------------------|---------------------|--------------|------------|------------------------|-------------------------|-----------------------|-------------------------|------------------------|
|           |                       |                     |              |            | Bait:<br><b>OsCPS4</b> | Bait:<br><b>CYP99A3</b> | Bait:<br><b>OsMAS</b> | Bait:<br><b>CYP99A2</b> | Bait:<br><b>OsKSL4</b> |
| <b>1</b>  | <b>CYP99A3</b>        | P450                | Os04g0178400 | 4*         | 3                      | N/A                     | 76                    | 26                      | 271                    |
| <b>2</b>  | <b>CYP701A8</b>       | P450                | Os06g0569500 | 6          | 4                      | 6                       | 89                    | 7                       | 154                    |
| <b>3</b>  | CYP99A2               | P450                | Os04g0180400 | 4*         | 8                      | 28                      | 33                    | N/A                     | 98                     |
| <b>4</b>  | CYP701A9              | P450                | Os06g0568600 | 6          | 22                     | 39                      | 69                    | 49                      | 323                    |
| <b>5</b>  | CYP71Z8               | P450                | Os10g0439800 | 10         | 31                     | 84                      | 7                     | 18                      | 230                    |
| <b>6</b>  | CYP71Z5               | P450                | Os02g0529800 | 2          | 55                     | 77                      | 165                   | 32                      | 175                    |
| <b>7</b>  | CYP94E3               | P450                | Os05g0382500 | 5          | 94                     | 210                     | 14                    | 58                      | 281                    |
| <b>8</b>  | <b>CYP76M14</b>       | P450                | Os01g0561600 | 1          | 172                    | 338                     | 67                    | 135                     | 409                    |
| <b>9</b>  | <b>CYP76M8</b>        | P450                | Os02g0569400 | 2^         | 620                    | 581                     | 882                   | 273                     | 4                      |
| <b>10</b> | CYP76M5               | P450                | Os02g0569000 | 2^         | 341                    | 249                     | 711                   | 194                     | 72                     |
| <b>11</b> | 2-ODD<br>candidate #1 | 2-ODD               | Os09g0245500 | 9          | 48                     | 12                      | 232                   | 139                     | 503                    |
| <b>12</b> | 2-ODD<br>candidate #2 | 2-ODD               | Os04g0662600 | 4          | 245                    | 464                     | 88                    | 136                     | 306                    |
| <b>13</b> | SDR<br>candidate #1   | SDR                 | Os07g0664000 | 7          | 16                     | 27                      | 42                    | 89                      | 558                    |
| <b>14</b> | <b>OsMAS</b>          | SDR                 | Os04g0179200 | 4*         | 17                     | 69                      | N/A                   | 22                      | 309                    |
| <b>15</b> | SDR<br>candidate #2   | SDR                 | Os07g0663700 | 7          | 66                     | 158                     | 20                    | 43                      | 24                     |
| <b>16</b> | <b>OsCPS4</b>         | Terpene<br>synthase | Os04g0178300 | 4*         | N/A                    | 3                       | 19                    | 8                       | 243                    |
| <b>17</b> | OsKSL8                | Terpene<br>synthase | Os11g0474800 | 11         | 47                     | 81                      | 112                   | 102                     | 447                    |
| <b>18</b> | OsKSL7                | Terpene<br>synthase | Os02g0570400 | 2^         | 111                    | 61                      | 332                   | 68                      | 103                    |
| <b>19</b> | <b>OsKSL4</b>         | Terpene<br>synthase | Os04g0179700 | 4*         | 386                    | 392                     | 532                   | 125                     | N/A                    |

List is ranked via Pearson's correlation coefficient between genes present in the momilactone biosynthetic cluster and biosynthetic candidates. Potential biosynthetic genes shown correspond only to genes belonging to CYP, 2-ODD, SDR, and terpene synthase families. Gene names in bold correspond to genes involved in momilactone biosynthesis. A \* or a ^ indicate genes present in either the momilactone gene cluster or the phytocassane gene cluster.

**Supplementary Table 2: Yields of diterpenoid products engineered in this study.**

| Pathway                  | Compound               | Compound use for standard | MEV Eng.    |                      | DXP Eng.    |                      | Plants | Plant weight (g) | Isolated (mg) | Isolated yield |                      |
|--------------------------|------------------------|---------------------------|-------------|----------------------|-------------|----------------------|--------|------------------|---------------|----------------|----------------------|
|                          |                        |                           | mg/g FW     | mg/g DW <sup>1</sup> | mg/g FW     | mg/g DW <sup>1</sup> |        |                  |               | ug/g FW        | ug/g DW <sup>1</sup> |
| taxane biosynthesis      | taxadiene (12)         | 5a-taxadiene-ol           | 0.13 ± 0.03 | 1.27 ± 0.31          | 0.02 ± 0.00 | 0.20 ± 0.03          | -      | -                | -             | -              | -                    |
| momilactone biosynthesis | syn-pimaradiene (1)    | GGOH                      | 0.13 ± 0.06 | 1.32 ± 0.57          | 0.01 ± 0.01 | 0.13 ± 0.07          | -      | -                | -             | -              | -                    |
|                          | (6)                    | momilactone B             | 0.06 ± 0.01 | 0.63 ± 0.10          | -           | -                    | -      | -                | -             | -              | -                    |
|                          | momilactone A (8)      | momilactone B             | 0.03 ± 0.02 | 0.28 ± 0.15          | -           | -                    | -      | -                | -             | -              | -                    |
|                          | (7)                    | momilactone B             | 0.01 ± 0.01 | 0.12 ± 0.07          | -           | -                    | -      | -                | -             | -              | -                    |
|                          | momilactone B          | momilactone B             | 0.02 ± 0.01 | 0.17 ± 0.08          | -           | -                    | 80     | 216              | 3.6           | 16.7           | 167                  |
| forskolin biosynthesis   | 13-R-manoyl oxide (13) | GGOH                      | 0.67 ± 0.07 | 6.67 ± 0.69          | 0.06 ± 0.01 | 0.57 ± 0.13          | -      | -                | -             | -              | -                    |
|                          | forskolin              | forskolin                 | 0.13 ± 0.03 | 1.27 ± 0.26          | 0.02 ± 0.01 | 0.19 ± 0.09          | -      | -                | -             | -              | -                    |

<sup>1</sup>Fresh to dry weight calculations correspond to typically observed ~90% weight loss after lyophilization of *N. benthamiana* leaves.

**Supplementary Table 3:** Germination efficiency of *A. thaliana* seeds (n=100).

| Time days | DMSO mock | SA 1 mM | momilactone B |         |       |
|-----------|-----------|---------|---------------|---------|-------|
|           |           |         | 2.5 uM        | 12.5 uM | 60 uM |
| <b>0</b>  | 0%        | 0%      | 0%            | 0%      | 0%    |
| <b>3</b>  | 99%       | 0%      | 0%            | 0%      | 0%    |
| <b>5</b>  | 99%       | 0%      | 97%           | 0%      | 0%    |
| <b>7</b>  | 99%       | 0%      | 97%           | 0%      | 0%    |
| <b>10</b> | 99%       | 0%      | 97%           | 81%     | 0%    |



**Supplementary Table 4:** List of PCR primer pairs used in this study.

| Purpose                  | Name              | Primer Sequence (5' to 3') |                                                          |
|--------------------------|-------------------|----------------------------|----------------------------------------------------------|
| Metabolic engineering    | HMGR              | Fwd                        | ATTCTGCCCAAATTCGCGACCGGTATGAAGAAAAAGCAAGCTGG             |
|                          |                   | Rev                        | GAAACCAGAGTTAAAGGCCTCGAGTCATGTTGTTGTTGTCGTTGTCCG         |
|                          | chlGGPPS          | Fwd                        | ATTCTGCCCAAATTCGCGACCGGT                                 |
|                          |                   | Rev                        | GAAACCAGAGTTAAAGGCCTCGAGTCAGTTTTGCCTGAATGCAATG           |
|                          | cytGGPPS          | Fwd                        | ATTCTGCCCAAATTCGCGACCGGTATGGCTTCTTATCAAGAATGC            |
|                          |                   | Rev                        | GAAACCAGAGTTAAAGGCCTCGAGTCAGTTTTGCCTGAATGCAATG           |
|                          | DXS               | Fwd                        | ATTCTGCCCAAATTCGCGACCGGTATGGCTTCTTCTGCATTTC              |
|                          |                   | Rev                        | GAAACCAGAGTTAAAGGCCTCGAGTCAAAACAGAGCTCCCTTGG             |
| Taxane biosynthesis      | chlTDS            | Fwd                        | ATTCTGCCCAAATTCGCGACCGGT                                 |
|                          |                   | Rev                        | GAAACCAGAGTTAAAGGCCTCGAGTCATACTTGAATTGGATCAATATAAACTTTTC |
|                          | cytTDS            | Fwd                        | ATTCTGCCCAAATTCGCGACCGGTATGGTAATGATGAGCAGCAG             |
|                          |                   | Rev                        | GAAACCAGAGTTAAAGGCCTCGAGTCATACTTGAATTGGATCAATATAAACTTTTC |
| Forskolin biosynthesis   | chlCfTPS2         | Fwd                        | ATTCTGCCCAAATTCGCGACCGGT                                 |
|                          |                   | Rev                        | GAAACCAGAGTTAAAGGCCTCGAG                                 |
|                          | (22-773)cytCfTPS2 | Fwd                        | ATTCTGCCCAAATTCGCGACCGGTATGAACAGCAATAAAAGGCAGTC          |
|                          |                   | Rev                        | GAAACCAGAGTTAAAGGCCTCGAG                                 |
|                          | (46-773)cytCfTPS2 | Fwd                        | ATTCTGCCCAAATTCGCGACCGGTATGGTTGCAAGTCTGGATGCG            |
|                          |                   | Rev                        | GAAACCAGAGTTAAAGGCCTCGAG                                 |
|                          | chlCfTPS3         | Fwd                        | ATTCTGCCCAAATTCGCGACCGGT                                 |
|                          |                   | Rev                        | GAAACCAGAGTTAAAGGCCTCGAG                                 |
|                          | (23-598)cytCfTPS3 | Fwd                        | ATTCTGCCCAAATTCGCGACCGGTATGCTGCAGCTGTTAAATGC             |
|                          |                   | Rev                        | GAAACCAGAGTTAAAGGCCTCGAG                                 |
|                          | (38-598)cytCfTPS3 | Fwd                        | ATTCTGCCCAAATTCGCGACCGGTATGGGAATCTTGCCAGTCCACC           |
|                          |                   | Rev                        | GAAACCAGAGTTAAAGGCCTCGAG                                 |
|                          | CYP76AH15         | Fwd                        | ATTCTGCCCAAATTCGCGACCGGT                                 |
|                          |                   | Rev                        | GAAACCAGAGTTAAAGGCCTCGAG                                 |
|                          | CYP76AH11         | Fwd                        | ATTCTGCCCAAATTCGCGACCGGT                                 |
|                          |                   | Rev                        | GAAACCAGAGTTAAAGGCCTCGAG                                 |
|                          | CYP76AH16         | Fwd                        | ATTCTGCCCAAATTCGCGACCGGT                                 |
|                          |                   | Rev                        | GAAACCAGAGTTAAAGGCCTCGAG                                 |
| ACT 1-8                  | Fwd               | ATTCTGCCCAAATTCGCGACCGGT   |                                                          |
|                          | Rev               | GAAACCAGAGTTAAAGGCCTCGAG   |                                                          |
| Momilactone biosynthesis | chlOsCPS4         | Fwd                        | ATTCTGCCCAAATTCGCGACCGGT                                 |
|                          |                   | Rev                        | GAAACCAGAGTTAAAGGCCTCGAG                                 |
|                          | cytOsCPS4         | Fwd                        | ATTCTGCCCAAATTCGCGACCGGTATGCCGCCGTACCCGGCC               |
|                          |                   | Rev                        | GAAACCAGAGTTAAAGGCCTCGAG                                 |
|                          | chlOsKSL4         | Fwd                        | ATTCTGCCCAAATTCGCGACCGGT                                 |
|                          |                   | Rev                        | GAAACCAGAGTTAAAGGCCTCGAG                                 |
|                          | cytOsKSL4         | Fwd                        | ATTCTGCCCAAATTCGCGACCGGTATGGCGGTGATGTCGTCCTG             |
|                          |                   | Rev                        | GAAACCAGAGTTAAAGGCCTCGAG                                 |
|                          | CYP99A3           | Fwd                        | ATTCTGCCCAAATTCGCGACCGGT                                 |
|                          |                   | Rev                        | GAAACCAGAGTTAAAGGCCTCGAG                                 |

| Purpose                                     | Name                                                               | Primer Sequence                                                       |
|---------------------------------------------|--------------------------------------------------------------------|-----------------------------------------------------------------------|
| Momilactone biosynthesis                    | CYP76M8                                                            | Fwd ATTCTGCCCAAATTCGCGACCGGT                                          |
|                                             |                                                                    | Rev GAAACCAGAGTTAAAGGCCTCGAG                                          |
|                                             | OsMAS                                                              | Fwd ATTCTGCCCAAATTCGCGACCGGT                                          |
|                                             |                                                                    | Rev GAAACCAGAGTTAAAGGCCTCGAG                                          |
|                                             | CYP76M14                                                           | Fwd ATTCTGCCCAAATTCGCGACCGGT                                          |
|                                             |                                                                    | Rev GAAACCAGAGTTAAAGGCCTCGAG                                          |
|                                             | CYP701A8                                                           | Fwd ATTCTGCCCAAATTCGCGACCGGT                                          |
|                                             |                                                                    | Rev GAAACCAGAGTTAAAGGCCTCGAG                                          |
| Momilactone biosynthesis gene candidates    | CYP99A2                                                            | Fwd ATTCTGCCCAAATTCGCGACCGGT                                          |
|                                             |                                                                    | Rev GAAACCAGAGTTAAAGGCCTCGAG                                          |
|                                             | CYP701A9                                                           | Fwd ATTCTGCCCAAATTCGCGACCGGT                                          |
|                                             |                                                                    | Rev GAAACCAGAGTTAAAGGCCTCGAG                                          |
|                                             | CYP71Z8                                                            | Fwd ATTCTGCCCAAATTCGCGACCGGT                                          |
|                                             |                                                                    | Rev GAAACCAGAGTTAAAGGCCTCGAG                                          |
|                                             | CYP71Z5                                                            | Fwd ATTCTGCCCAAATTCGCGACCGGT                                          |
|                                             |                                                                    | Rev GAAACCAGAGTTAAAGGCCTCGAG                                          |
|                                             | CYP94E3                                                            | Fwd ATTCTGCCCAAATTCGCGACCGGT                                          |
|                                             |                                                                    | Rev GAAACCAGAGTTAAAGGCCTCGAG                                          |
|                                             | CYP76M5                                                            | Fwd ATTCTGCCCAAATTCGCGACCGGT                                          |
|                                             |                                                                    | Rev GAAACCAGAGTTAAAGGCCTCGAG                                          |
|                                             | 2-ODD candidate #1                                                 | Fwd ATTCTGCCCAAATTCGCGACCGGT                                          |
|                                             |                                                                    | Rev GAAACCAGAGTTAAAGGCCTCGAG                                          |
|                                             | 2-ODD candidate #2                                                 | Fwd ATTCTGCCCAAATTCGCGACCGGT                                          |
|                                             |                                                                    | Rev GAAACCAGAGTTAAAGGCCTCGAG                                          |
| SDR candidate #1                            | Fwd ATTCTGCCCAAATTCGCGACCGGT                                       |                                                                       |
|                                             | Rev GAAACCAGAGTTAAAGGCCTCGAG                                       |                                                                       |
| SDR candidate #2                            | Fwd ATTCTGCCCAAATTCGCGACCGGT                                       |                                                                       |
|                                             | Rev GAAACCAGAGTTAAAGGCCTCGAG                                       |                                                                       |
| GFP fusion constructs                       | GFP                                                                | Fwd <b>GGTTCCGGGAAGCATGACTAGCAAAGGAGAAGAAC</b>                        |
|                                             |                                                                    | Rev <b>GAAACCAGAGTTAAAGGCCTCGAGTTATTTGTATAGTTCATCCATGCC</b>           |
|                                             | Gibson overlaps chITDS-GFP                                         | Fwd ATTCTGCCCAAATTCGCGACCGGT                                          |
|                                             |                                                                    | Rev <b>GTTCTTCTCCTTTGCTAGTCATGCTTCCCGAACCTACTTGAATTGGATCAATATAAC</b>  |
|                                             | Gibson overlaps cytTDS-GFP                                         | Fwd ATTCTGCCCAAATTCGCGACCGGT <b>ATGGTAATGATGAGCAGCAG</b>              |
|                                             |                                                                    | Rev <b>GTTCTTCTCCTTTGCTAGTCATGCTTCCCGAACCTACTTGAATTGGATCAATATAAC</b>  |
|                                             | Gibson overlaps chlGGPPS-GFP                                       | Fwd ATTCTGCCCAAATTCGCGACCGGT                                          |
|                                             |                                                                    | Rev <b>GTTCTTCTCCTTTGCTAGTCATGCTTCCCGAACCGTTTTGCCTGAATGCAATGTAATC</b> |
|                                             | Gibson overlaps cytGGPPS-GFP                                       | Fwd ATTCTGCCCAAATTCGCGACCGGT <b>ATGGCTTCTTCAAGAATGC</b>               |
|                                             |                                                                    | Rev <b>GTTCTTCTCCTTTGCTAGTCATGCTTCCCGAACCGTTTTGCCTGAATGCAATGTAATC</b> |
| Gibson overlaps Small RuBisCo subunit - GFP | Fwd ATTCTGCCCAAATTCGCGACCGGT <b>ATGGCTTCTTCTATGCTCTCTTCC</b>       |                                                                       |
|                                             | Rev <b>GTTCTTCTCCTTTGCTAGTCATGCTTCCCGAACCTTCGGAATCGGTAAGGTCAGG</b> |                                                                       |

<sup>1</sup>Nucleotides emphasized in **bold** represent those which hybridize to the gene of interest. Nucleotides emphasized in *italics* represent those which hybridize to the four peptide linker used to link fusion protein constructs. All other nucleotides consist of the 5' overlaps designed for Gibson assembly with pEAQ-HT vector. Gene accession numbers and IDs can be found in Supplementary Table 5.

**Supplementary Table 5: Accession numbers and gene IDs used in this study.**

| <b>Name</b>                  | <b>Organism</b>              | <b>Gene ID / Accession</b>    | <b>Reference</b> |
|------------------------------|------------------------------|-------------------------------|------------------|
| <b>HMGR</b>                  | <i>Nicotiana tabacum</i>     | AT1G76490.1 / AY488113        | 51               |
| <b>GGPPS</b>                 | <i>Taxus canadensis</i>      | AF081514                      | 60               |
| <b>DXS</b>                   | <i>Arabidopsis thaliana</i>  | AT4G15560.1 / BT002340        | 52               |
| <b>TDS</b>                   | <i>Taxus brevifolia</i>      | U48796                        | 38               |
| <b>CFTPS2</b>                | <i>Plectranthus barbatus</i> | KF444507                      | 42               |
| <b>CFTPS3</b>                | <i>Plectranthus barbatus</i> | KF444508                      |                  |
| <b>CYP76AH15</b>             | <i>Plectranthus barbatus</i> | KT382358                      | 20               |
| <b>CYP76AH11</b>             | <i>Plectranthus barbatus</i> | KT382349                      |                  |
| <b>CYP76AH16</b>             | <i>Plectranthus barbatus</i> | KT382359                      |                  |
| <b>ACT 1-8</b>               | <i>Plectranthus barbatus</i> | KT382363                      |                  |
| <b>OsCPS4</b>                | <i>Oryza sativa</i>          | Os04g0178300 / AB066270       | 25, 26           |
| <b>OsKSL4</b>                | <i>Oryza sativa</i>          | Os04g0179700 / AB126934       | 27, 28           |
| <b>CYP99A3</b>               | <i>Oryza sativa</i>          | Os04g0178400 / AK071864       | 29               |
| <b>CYP76M8</b>               | <i>Oryza sativa</i>          | Os02g0569400 / XM_015768144.1 | 30               |
| <b>OsMAS</b>                 | <i>Oryza sativa</i>          | Os04g0179200 / XM_015778721.1 | 32               |
| <b>CYP76M14</b>              | <i>Oryza sativa</i>          | Os01g0561600 / XM_015773010.1 | This study       |
| <b>CYP701A8</b>              | <i>Oryza sativa</i>          | Os06g0569500 / XM_015785419.1 | 43               |
| <b>CYP99A2</b>               | <i>Oryza sativa</i>          | Os04g0180400 / XM_015778482.1 | -                |
| <b>CYP701A9</b>              | <i>Oryza sativa</i>          | Os06g0568600 / XM_015786143.1 | -                |
| <b>CYP71Z8</b>               | <i>Oryza sativa</i>          | Os10g0439800 / XM_015759387.1 | -                |
| <b>CYP71Z5</b>               | <i>Oryza sativa</i>          | Os02g0529800 / XM_015768673.1 | -                |
| <b>CYP94E3</b>               | <i>Oryza sativa</i>          | Os05g0382500 / XM_015782035.1 | -                |
| <b>CYP76M5</b>               | <i>Oryza sativa</i>          | Os02g0569000 / XM_015768639.1 | 30               |
| <b>2-ODD candidate #1</b>    | <i>Oryza sativa</i>          | Os09g0245500 / XM_015755150.1 | -                |
| <b>2-ODD candidate #2</b>    | <i>Oryza sativa</i>          | Os04g0662600 / XM_015779149.1 | 59               |
| <b>SDR candidate #1</b>      | <i>Oryza sativa</i>          | Os07g0664000 / XM_015790180.1 | -                |
| <b>SDR candidate #2</b>      | <i>Oryza sativa</i>          | Os07g0663700 / XM_015791272.1 | -                |
| <b>Small RuBisCo subunit</b> | <i>Arabidopsis thaliana</i>  | RBCS1A / AT1G67090.1          | -                |

**Supplementary Table 6:** Chloroplast transit peptide predictions using ChloroP and LOCALIZER.

| Gene                 | Chloroplast transit peptide residues |           |
|----------------------|--------------------------------------|-----------|
|                      | ChloroP                              | LOCALIZER |
| <b>GGPPS</b>         | (1 - 18)                             | (1 - 41)  |
| <b>TDS</b>           | (1 - 58)                             | (1 - 51)  |
| <b><i>Cf</i>TPS2</b> | (1 -45)                              | (1 - 21)  |
| <b><i>Cf</i>TPS3</b> | (1 - 37)                             | (1 - 22)  |
| <b>OsCPS4</b>        | (1 - 56)                             | (1 - 52)  |
| <b>OsKSL4</b>        | (1 - 81)                             | (1 - 73)  |

<sup>1</sup> Cells in gray indicate the truncated gene variant used in this study.

**Supplementary Table 7:** Table of Pfam numbers used to find momilactone biosynthetic genes

| <b>Family</b>           | <b>Pfam #</b> | <b>ID</b>       |
|-------------------------|---------------|-----------------|
| <b>CYP450s</b>          | PF00067       | p450            |
| <b>2-ODDs</b>           | PF03171       | 2OG-Fell_Oxy    |
|                         | PF13532       | 2OG-Fell_Oxy 2  |
|                         | PF13640       | 2OG-Fell_Oxy 3  |
|                         | PF13661       | 2OG-Fell_Oxy 4  |
|                         | PF13759       | 2OG-Fell_Oxy 5  |
|                         | PF10014       | 2OG-Fe_Oxy_2    |
|                         | PF16870       | OxoGdeHyase_C   |
| <b>SDRs</b>             | PF00106       | Adh_short       |
| <b>Terpene synthase</b> | PF01397       | Terpene_synth   |
|                         | PF03936       | Terpene_synth_C |
| <b>Other PFAMs</b>      | PF01370       | Epimerase       |
|                         | PF01073       | 3Beta_HSD       |
